# Supplementary material for: Application of phase correction to improve the characterization of photooxidation products of lignin using 7 Tesla Fourier-transform ion cyclotron resonance mass spectrometry
Source: Atypon-hosted journal article supplement (doi:10.1139/facets-2016-0069), 2017-01-01
Supplement: facets-2016-0069_supplement1.pdf [file facets-2016-0069_supplement1.pdf]

# **Application of Phase Correction to Improve the Characterization of Photooxidation Products of Lignin Using 7 Tesla Fourier-Transform Ion Cyclotron Resonance Mass Spectrometry**

Yulin Qi<sup>1</sup>, Ruoji Luo<sup>2</sup>, Wolfgang Schrader<sup>2</sup>, Dietrich A. Volmer<sup>1\*</sup>

<sup>1</sup>*Institute of Bioanalytical Chemistry, Saarland University, Saarbrücken, Germany*

<sup>2</sup>*Max-Planck-Institut für Kohlenforschung, Mülheim an der Ruhr, Germany*

\*Corresponding author:

Prof. Dr. Dietrich A. Volmer

Saarland University

Institute of Bioanalytical Chemistry

D-66123 Saarbrücken, Germany

Tel +49 681 302 3433; Fax +49 681 302 2963

Email: Dietrich.Volmer@mx.uni-saarland.de

This Supplementary Material contains Figures S1-S6 and Table S1.

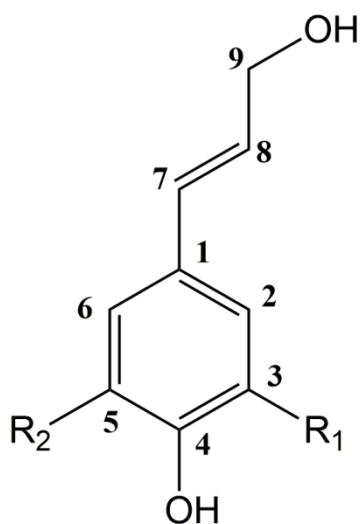

**Fig. S1.** Structures of the three main lignin monolignols with numbering scheme for the carbon positions: coumaryl alcohol ( $R_1 = R_2 = H$ ), coniferyl alcohol ( $R_1 = OCH_3$ ,  $R_2 = H$ ), and sinapyl alcohol ( $R_1 = R_2 = OCH_3$ ).

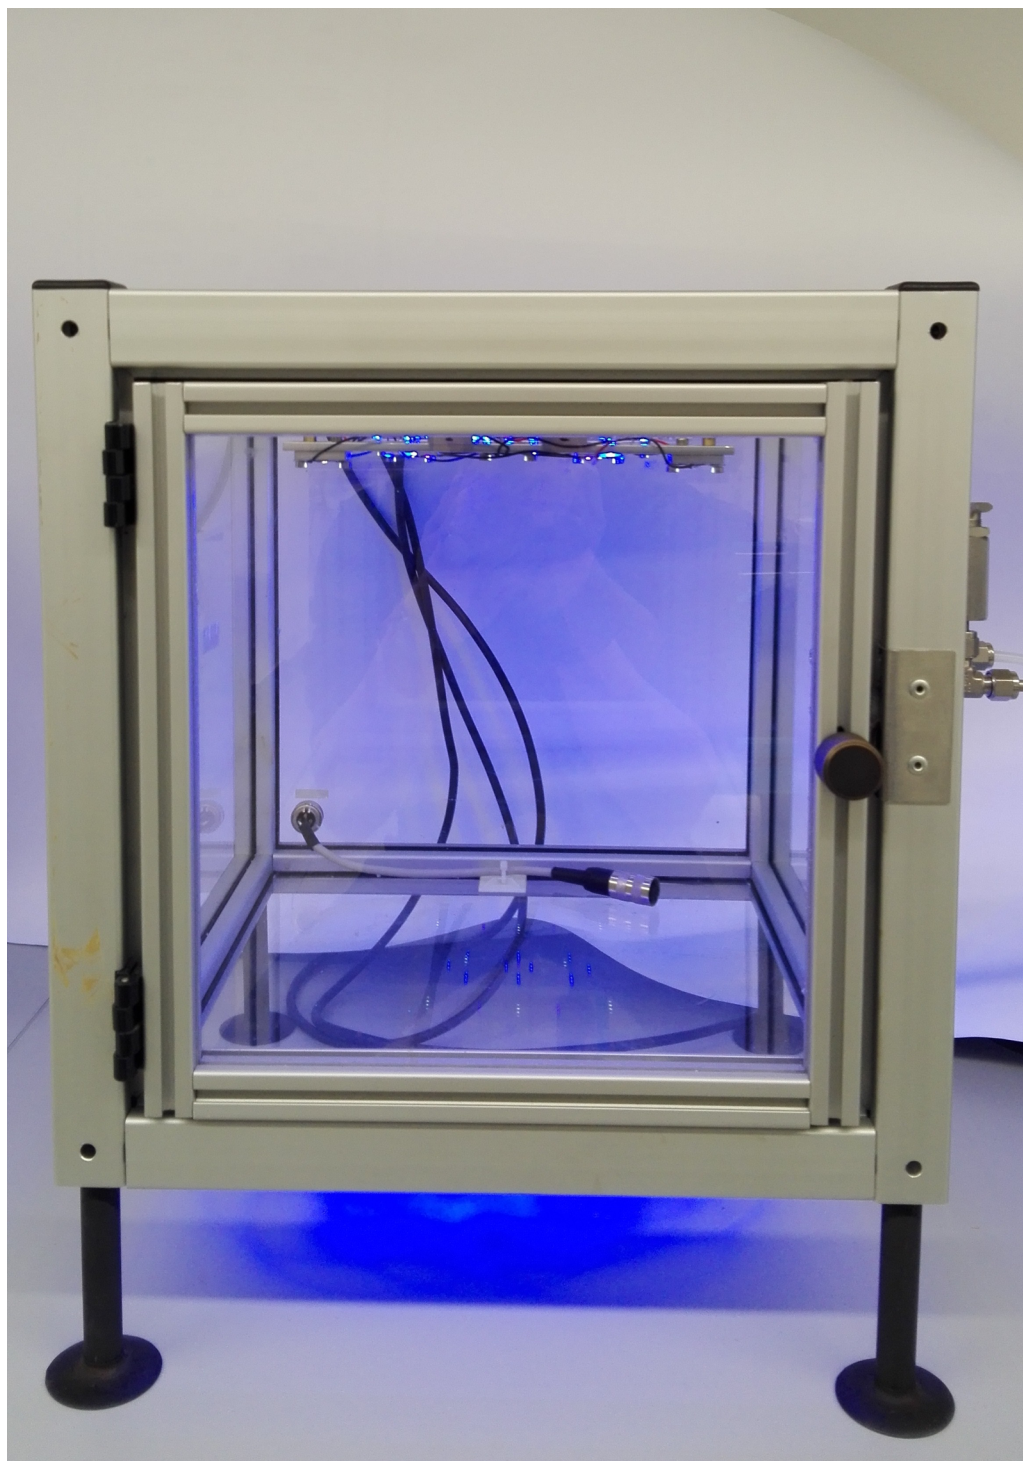

**Fig. S2.** Custom-built photooxidation chamber for the simulated solar radiation experiments described in this study.

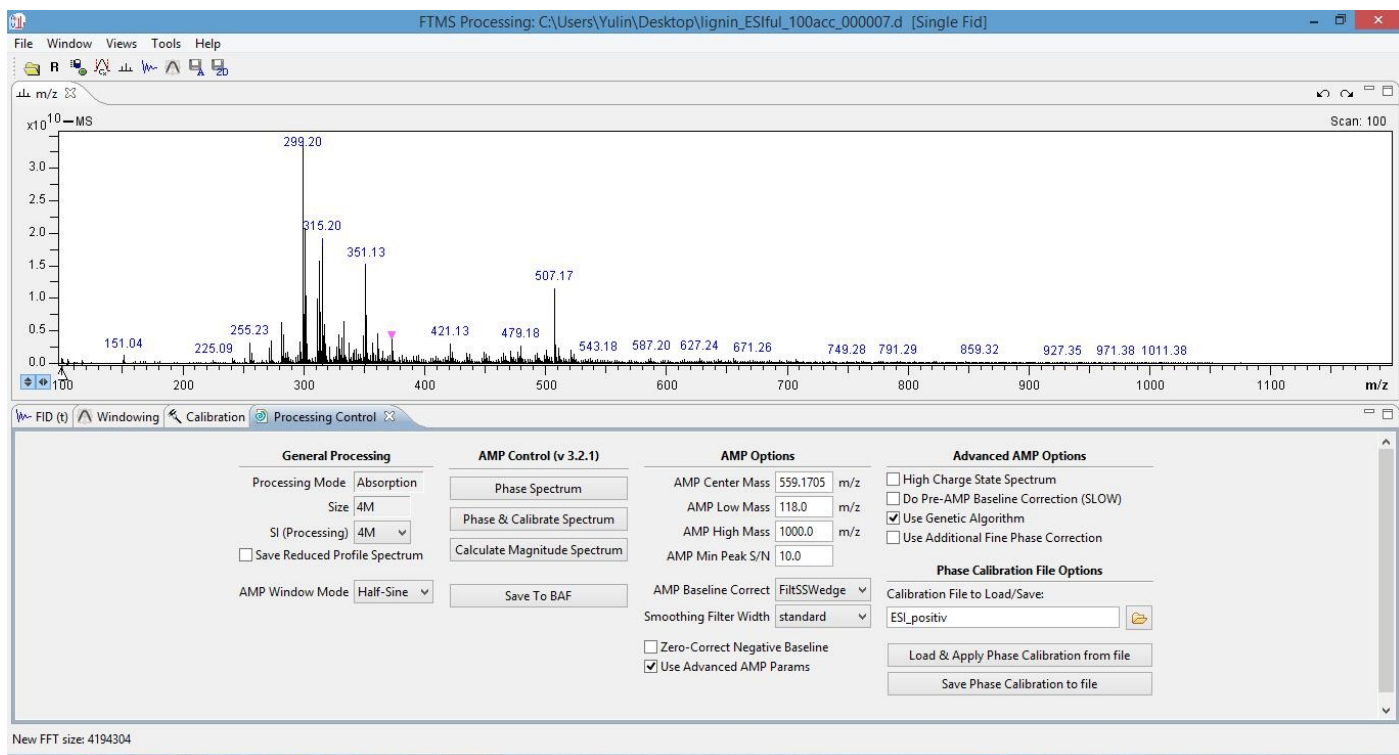

**Fig. S3.** Screenshot of the Bruker fims Processing software v2.1.0 interface, to illustrate the essential parameter set required for processing the absorption mode spectra in this paper.

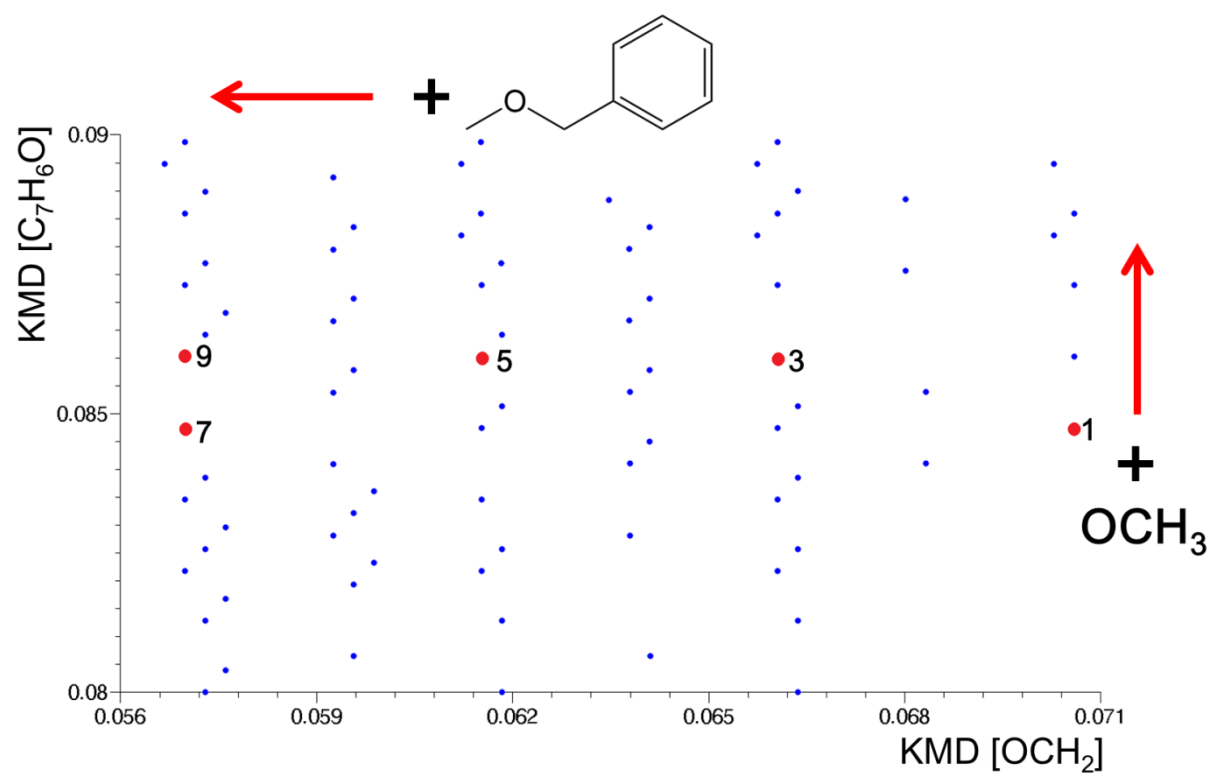

**Fig. S4.** Two-dimensional mass defect matrix plot, methoxylation (OCH<sub>2</sub>) *versus* (C<sub>7</sub>H<sub>6</sub>O); the lignin compounds selected for Fig. 2 in the main article are highlighted in red.

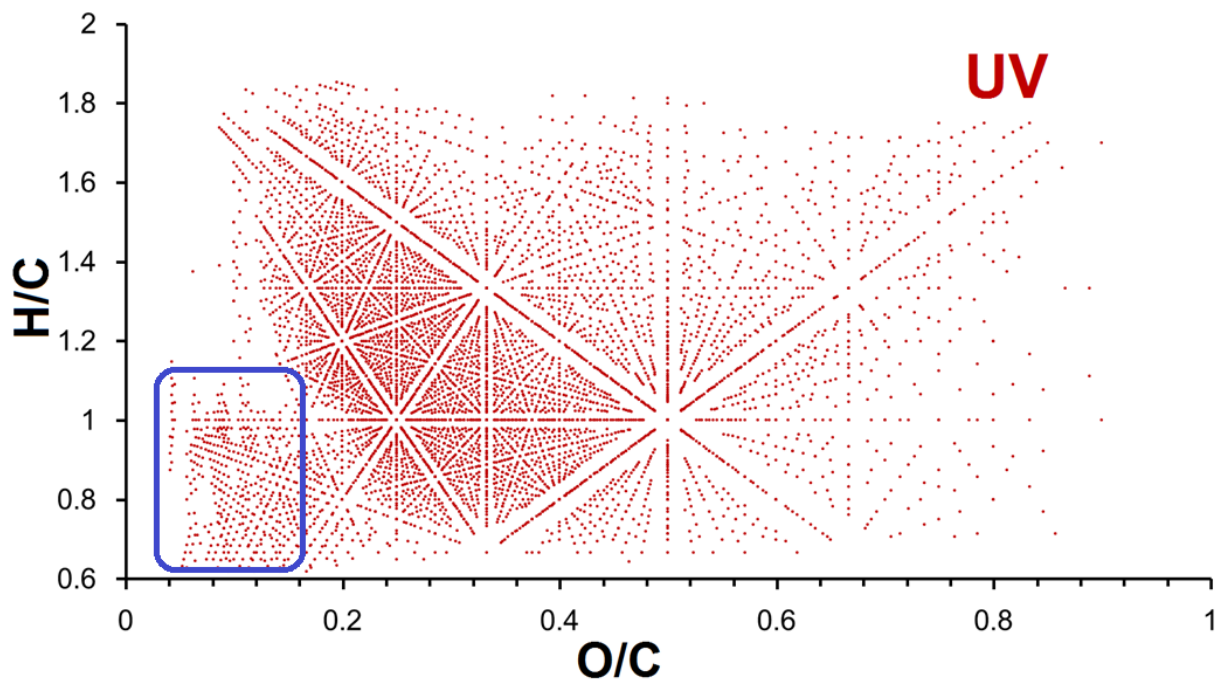

**Fig. S5.** van Krevelen diagram for species detected in an UV-oxidized lignin samples; the newly-discovered compounds produced by UV fragmentation are in the circled region. Reprinted from (Qi et al. 2016) with permission from Springer.

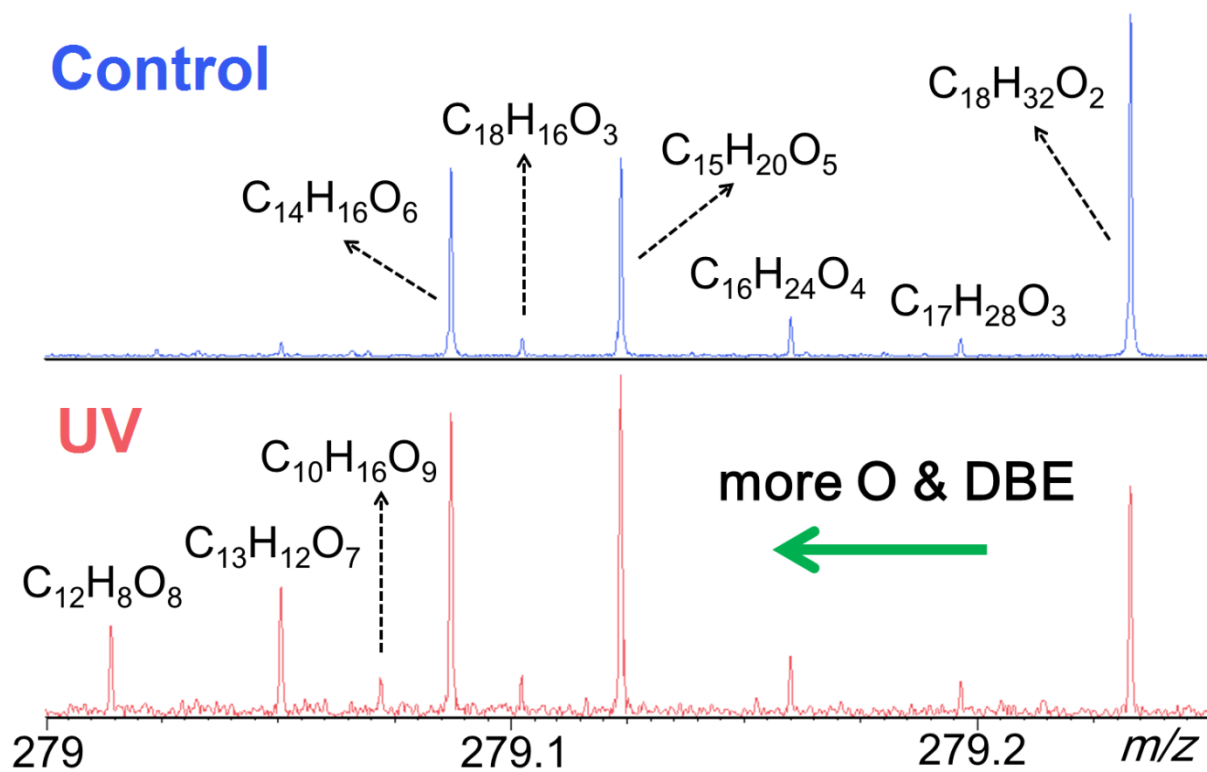

**Fig. S6.** Mass scale-expanded segments (0.25 u) of the lignin broadband mass spectra. The shift to lower mass defect in the UV-oxidized sample reflects higher oxygen content and DBE value. Reprinted from (Qi et al. 2016) with permission from Springer.

**Table S1.** Peak assignments for Fig. 6 of the main text.

| <b>Compound</b>                                | <b>Calc. <i>m/z</i></b> | <b>Exp. <i>m/z</i></b> | <b>ppm error</b> |
|------------------------------------------------|-------------------------|------------------------|------------------|
| C <sub>12</sub> H <sub>8</sub> O <sub>8</sub>  | 279.01464               | 279.01462              | -0.08            |
| C <sub>13</sub> H <sub>12</sub> O <sub>7</sub> | 279.05103               | 279.05100              | -0.09            |
| C <sub>10</sub> H <sub>16</sub> O <sub>9</sub> | 279.07216               | 279.07215              | -0.04            |
| C <sub>14</sub> H <sub>16</sub> O <sub>6</sub> | 279.08741               | 279.08744              | 0.10             |
| C <sub>18</sub> H <sub>16</sub> O <sub>3</sub> | 279.10267               | 279.10271              | 0.15             |
| C <sub>15</sub> H <sub>20</sub> O <sub>5</sub> | 279.12380               | 279.12383              | 0.12             |
| C <sub>16</sub> H <sub>24</sub> O <sub>4</sub> | 279.16018               | 279.16021              | 0.10             |
| C <sub>17</sub> H <sub>28</sub> O <sub>3</sub> | 279.19657               | 279.19654              | -0.10            |
| C <sub>18</sub> H <sub>32</sub> O <sub>2</sub> | 279.23295               | 279.23297              | 0.06             |

## References

- Qi, Y., Hempelmann, R. & Volmer, D.A., 2016. Shedding light on the structures of lignin compounds: photo-oxidation under artificial UV light and characterization by high resolution mass spectrometry. *Analytical and Bioanalytical Chemistry*, pp.1–8. Available at: <http://dx.doi.org/10.1007/s00216-016-9928-7>.
